# Supplementary material for: Decreased severity of experimental autoimmune arthritis in peptidylarginine deiminase type 4 knockout mice
Source: PubMed Central journal article supplement (PMC4858923; doi:10.1186/s12891-016-1055-2), 2016-05-05

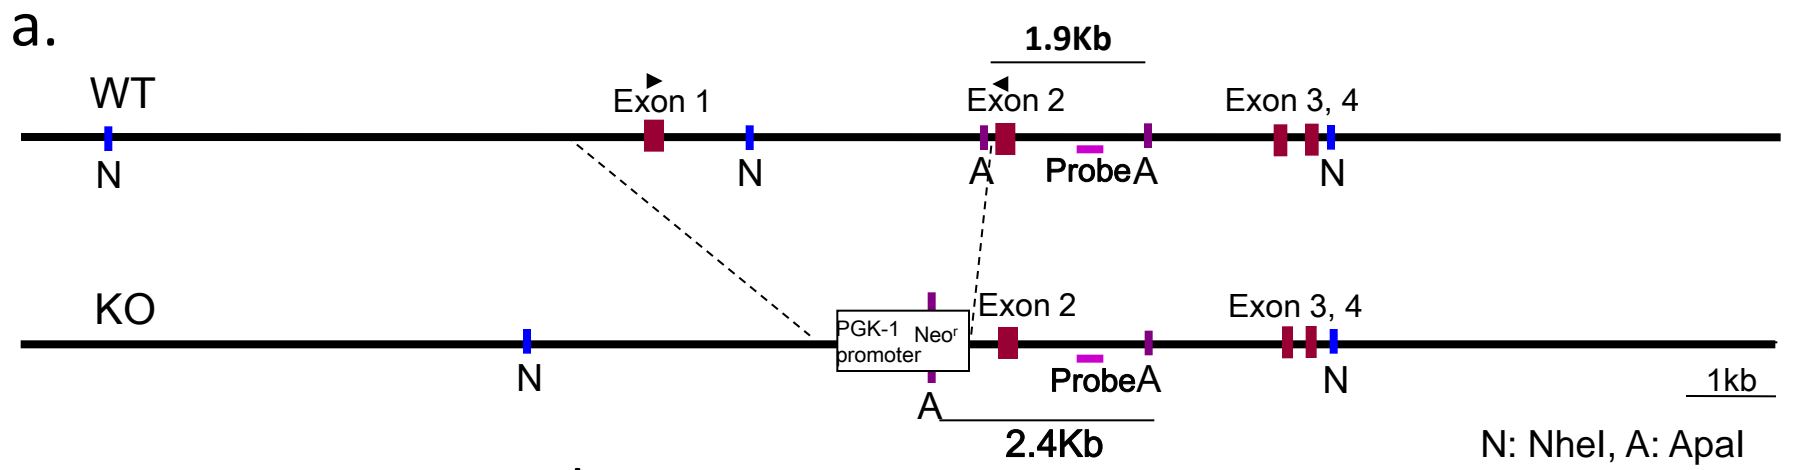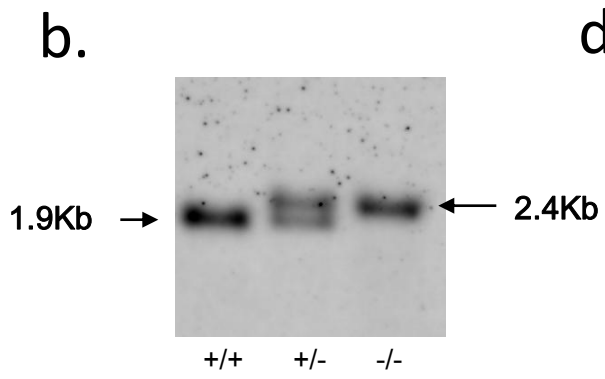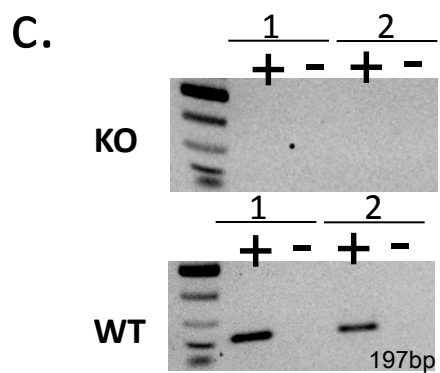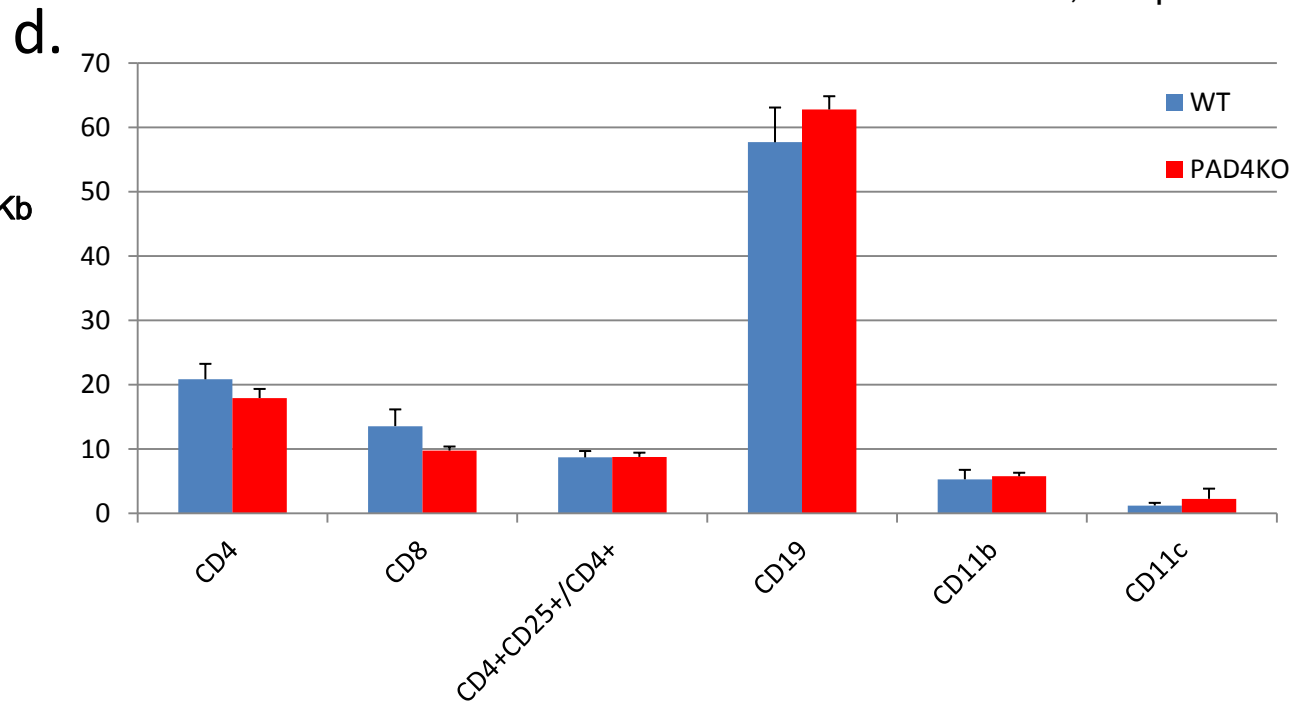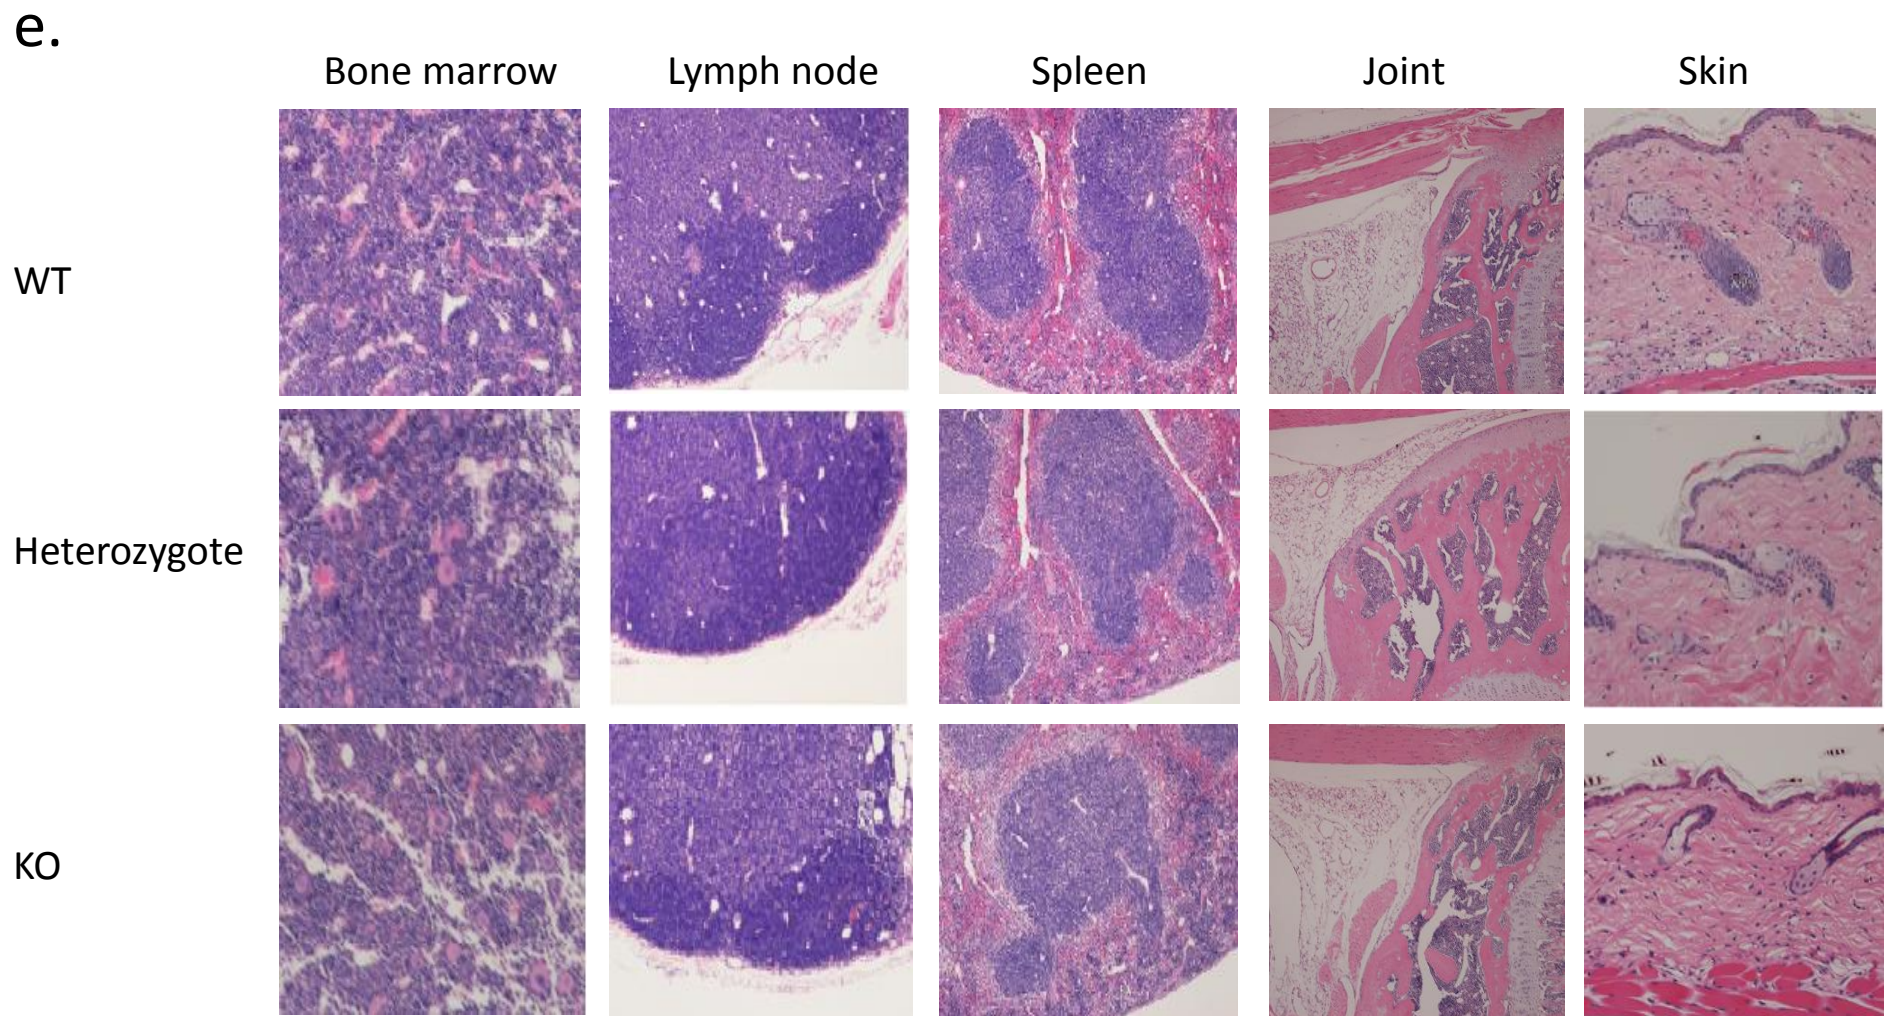

Supplement: 12891_2016_1055_MOESM1_ESM.pdf [file 12891_2016_1055_MOESM1_ESM.pdf]
