# Supplementary material for: Decreased severity of experimental autoimmune arthritis in peptidylarginine deiminase type 4 knockout mice
Source: Springer Nature journal article supplement (doi:10.1186/s12891-016-1055-2), 2016-05-05

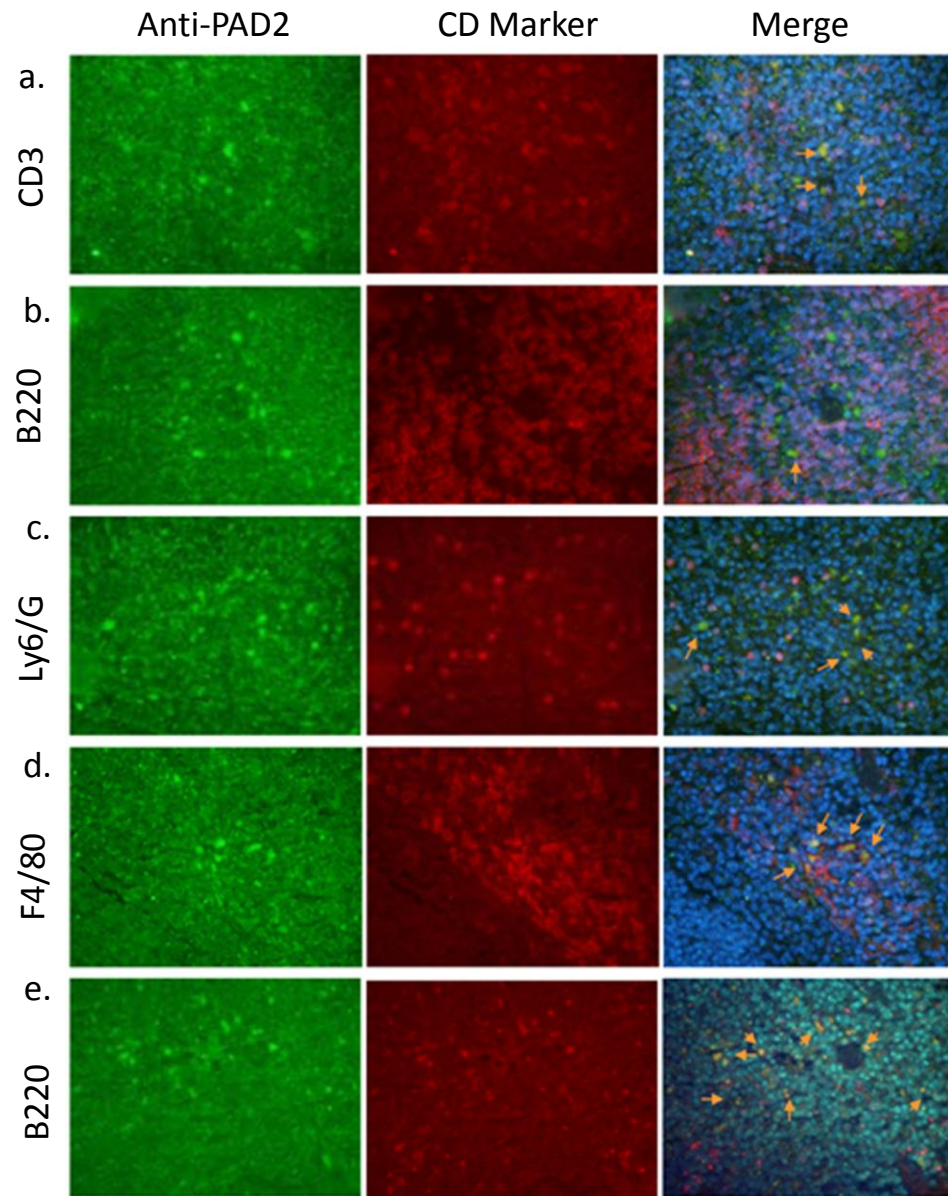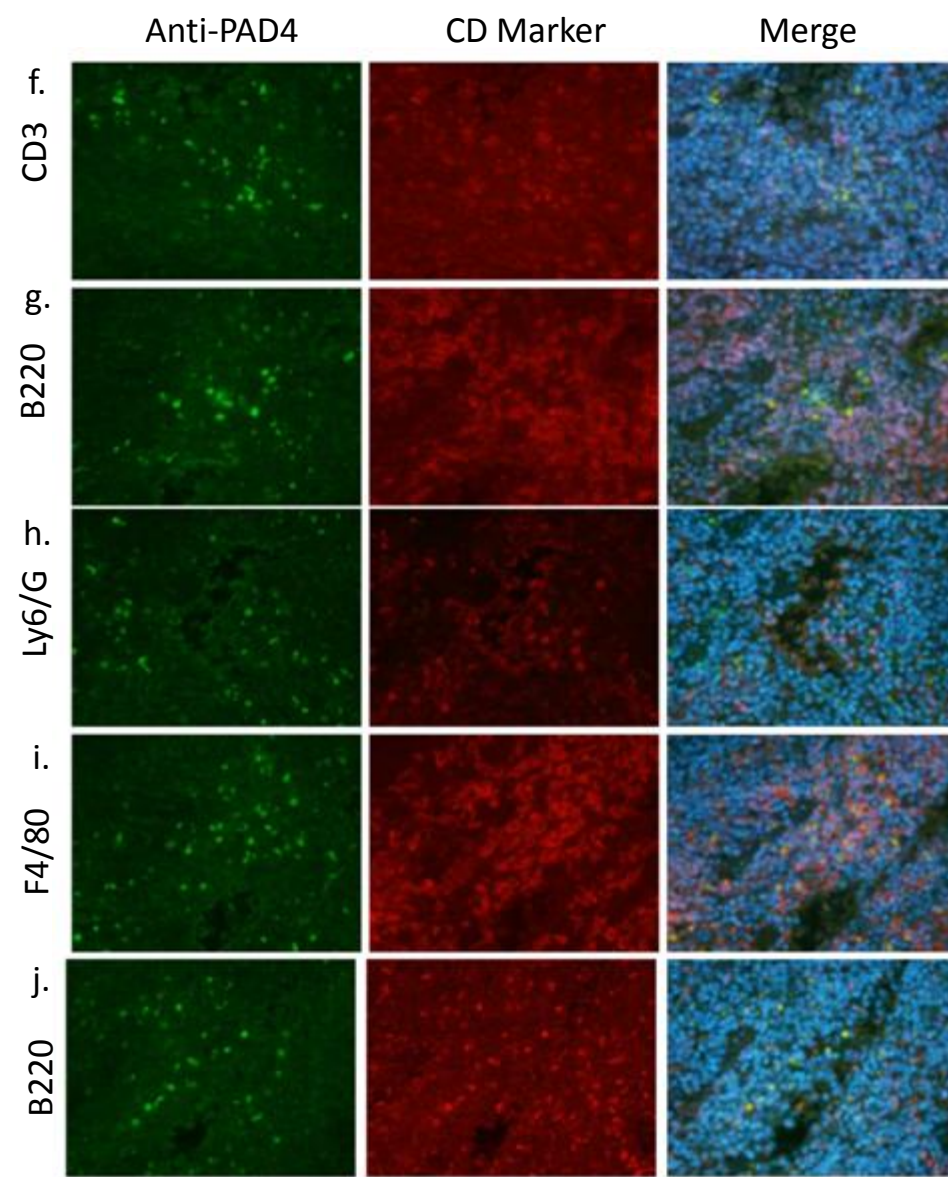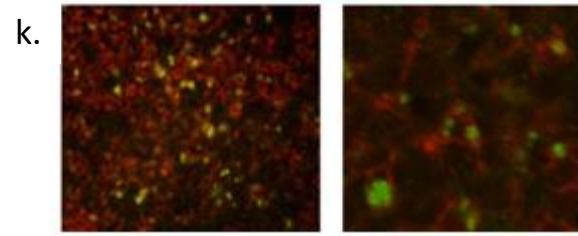

Supplement: MOESM3 [file 10111088]
